# Supplementary material for: TLR4 modulates inflammatory gene targets in the retina during Bacillus cereus endophthalmitis
Source: Springer Nature journal article supplement (doi:10.1186/s12886-018-0764-8), 2018-04-16

S1 Fig. Ingenuity Pathway Analysis of acute proinflammatory response and inflammatory cell recruitment genes upregulated 5-fold or greater following *B. cereus* ATCC14579 infection.

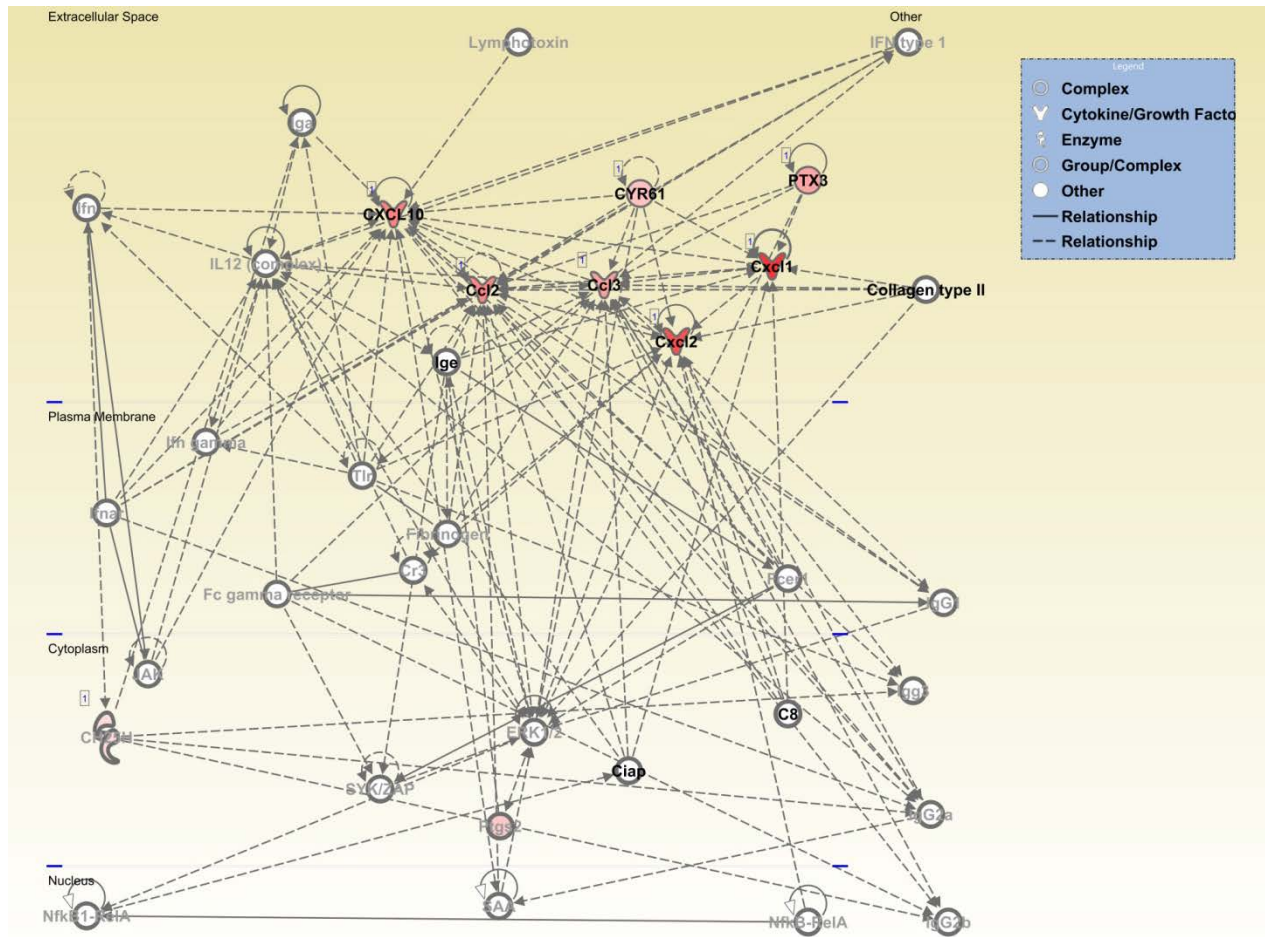

Supplement: MOESM3 [file 15703332]
